# Supplementary material for: Low Ozone Concentrations Differentially Affect the Structural and Functional Features of Non-Activated and Activated Fibroblasts In Vitro
Source: MDPI journal article supplement (doi:10.3390/ijms221810133), 2021-09-20
Supplement: s1 [file s1]

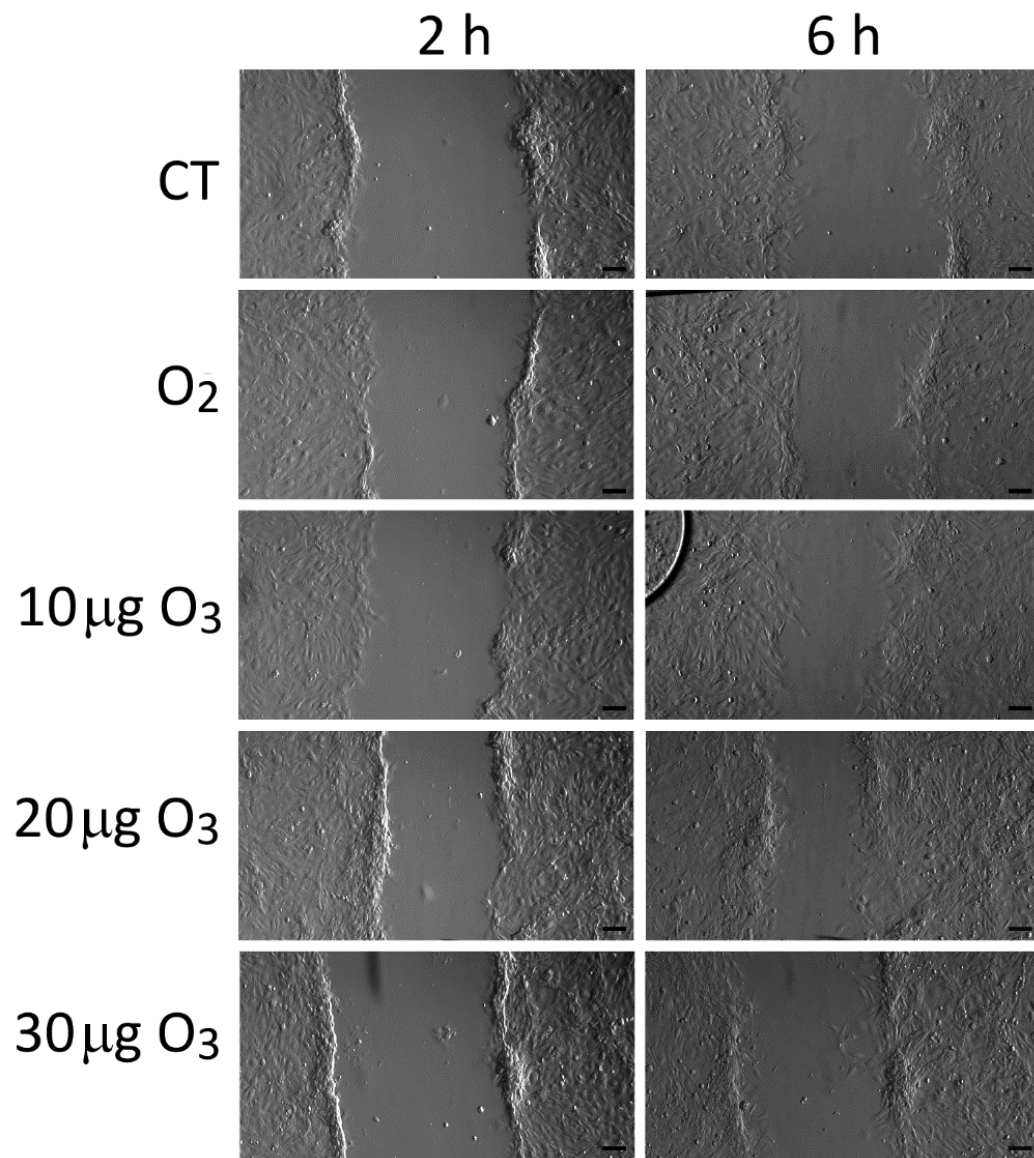

**Figure S2.** Wound healing assay of LPS-activated fibroblasts. Inverted microscope images of control (CT), O<sub>2</sub>-, 10 μg O<sub>3</sub>-, 20 μg O<sub>3</sub>- and 30 μg O<sub>3</sub>-treated fibroblasts at 2 h and 6 h. Bars: 200 μm.
